# Supplementary material for: Alp7-Mto1 and Alp14 synergize to promote interphase microtubule regrowth from the nuclear envelope
Source: PubMed Central journal article supplement — J Mol Cell Biol. 2019 May 14;11(11):944–55. doi: 10.1093/jmcb/mjz038 (PMC6927237; doi:10.1093/jmcb/mjz038), 2019-05-14
Supplement: jmcb-2019-0016_r2_supplementary_material_mjz038.pdf [file jmcb-2019-0016_r2_supplementary_material_mjz038.pdf]

## **Supplementary data**

### **Alp7-Mto1 and Alp14 synergize to promote interphase microtubule regrowth from the nuclear envelope**

**Wenyue Liu<sup>1, 2, 3</sup>, Fan Zheng<sup>1, 2, 3</sup>, Yucai Wang<sup>4</sup>, and Chuanhai Fu<sup>1, 2, 3,\*</sup>**

1 Division of Molecular & Cell Biophysics, Hefei National Science Center for Physical Sciences, University of Science and Technology of China, Hefei, Anhui, China; 2 Chinese Academy of Sciences Center for Excellence in Molecular Cell Sciences, School of Life Sciences, University of Science and Technology of China, Hefei, Anhui, China; 3 Anhui Key Laboratory for Cellular Dynamics & Chemical Biology, University of Science and Technology of China, Hefei, China; 4 School of Life Sciences, University of Science and Technology of China, Hefei, Anhui, China

\*To whom correspondence should be addressed: Chuanhai Fu: Chinese Academy of Sciences Center for Excellence in Molecular Cell Sciences, School of Life Sciences, University of Science and Technology of China, Hefei, Anhui, China; [chuanhai@ustc.edu.cn](mailto:chuanhai@ustc.edu.cn); Tel. 86 (551) 63600805.

**Supplementary data includes five supplemental figures and two supplemental tables:**

**Supplementary Figures:**

**Figure S1**

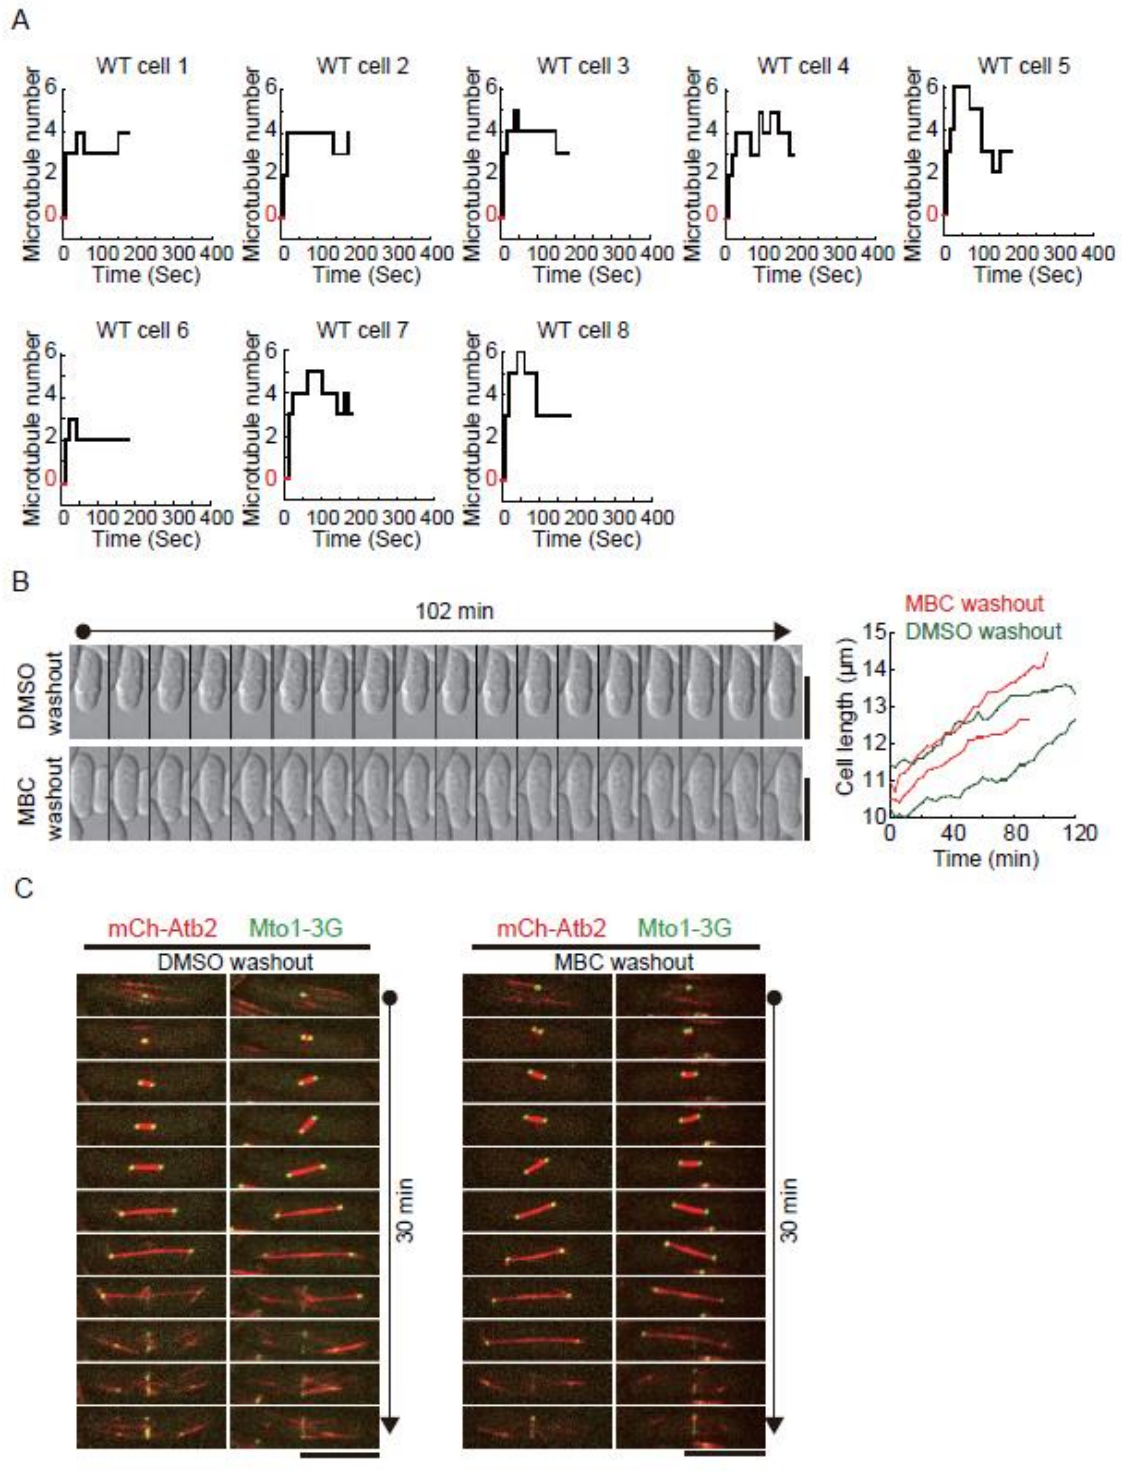

**Figure S1.** (A) Step plots of microtubule number against time after MBC washout for wild type cells (related to Figure 1F). (B) Time-lapse DIC (Differential interference contrast) images taken

after MBC or DMSO (control) washout. On the right are plots of cell length against time. Note that MBC treatment did not appear to affect cell growth after the removal of the drug. (C) Maximum projection time-lapse images of cells expressing Mto1-3GFP and mCherry-Atb2. Images were acquired after MBC or DMSO washout. Note that mitosis progression was comparable in cells after the removal of DMSO or MBC.

**Figure S2**

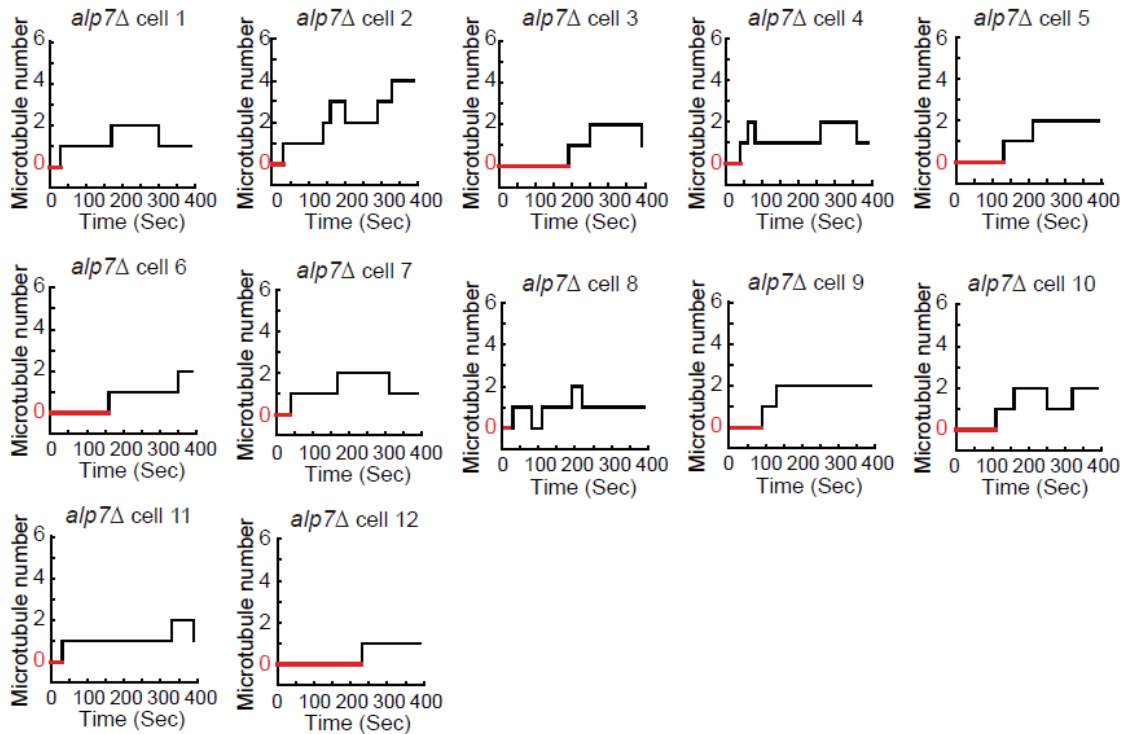

**Figure S2.** Step plots of microtubule number against time after MBC washout for *alp7Δ* cells (related to Figure 3E).

**Figure S3**

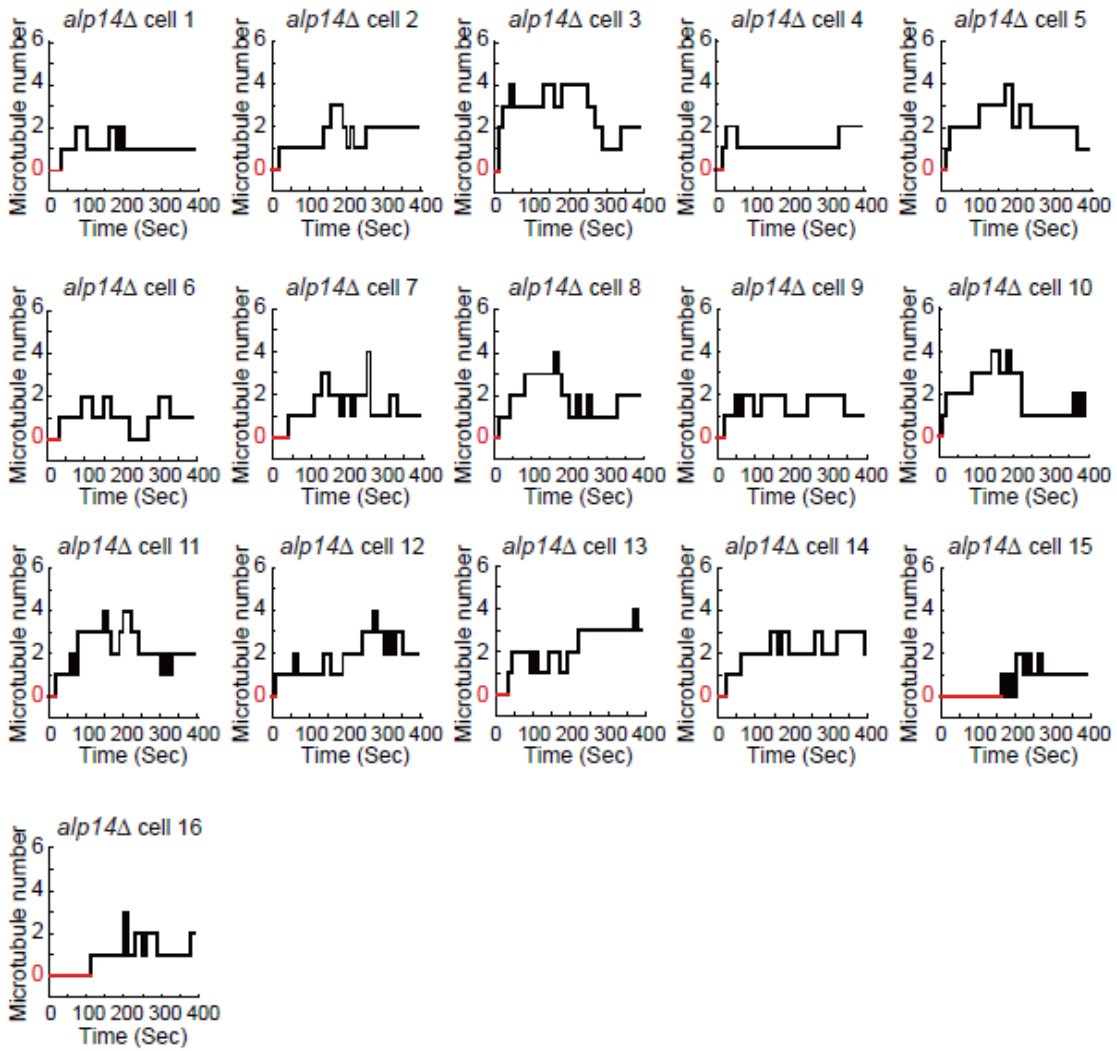

**Figure S3.** Step plots of microtubule number against time after MBC washout for *alp14Δ* cells (related to Figure 3F).

**Figure S4**

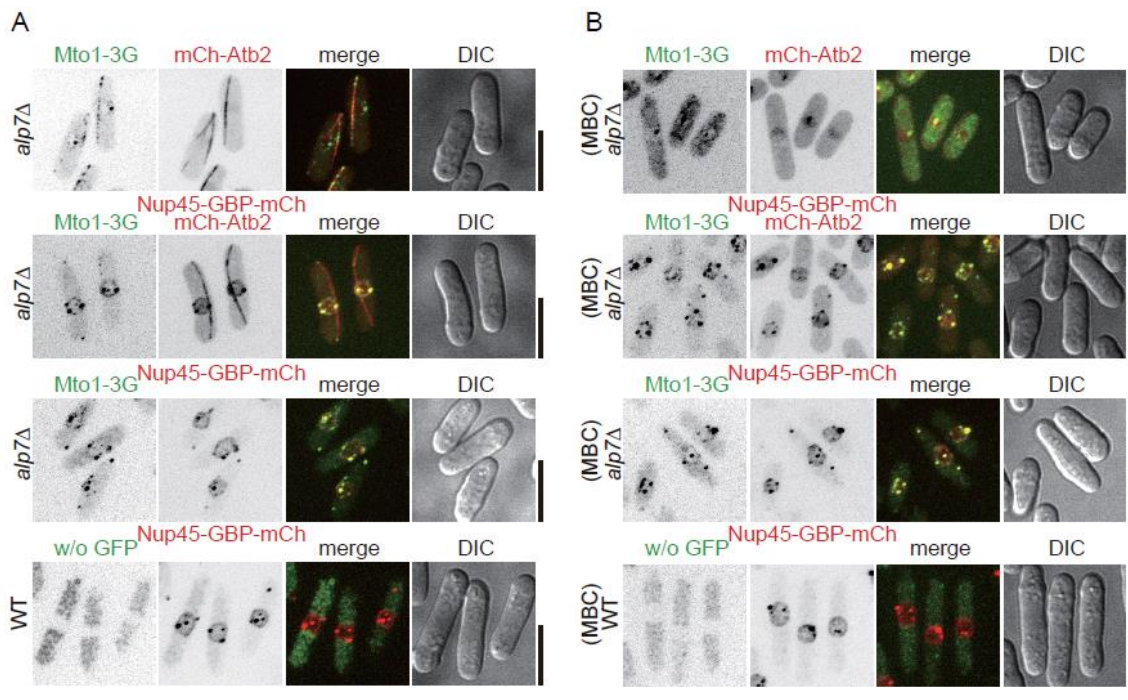

**Figure S4. Tethering Mto1-3GFP to the nuclear envelope by GBP tagged Nup45 (related to Figures 5A and 5B).** (A) Maximum projection images of WT and *alp7Δ* cells expressing the indicated fluorescently tagged proteins. The WT cells expressed only Nup45-GBP-mCherry. Note that Nup45-GBP-mCherry decorated the NE on which a few Nup45-GBP-mCherry foci were present. Scale bar, 10  $\mu$ m. (B) Maximum projection images of the indicated cells in (A) treated with MBC. Scale bar, 10  $\mu$ m.

**Figure S5**

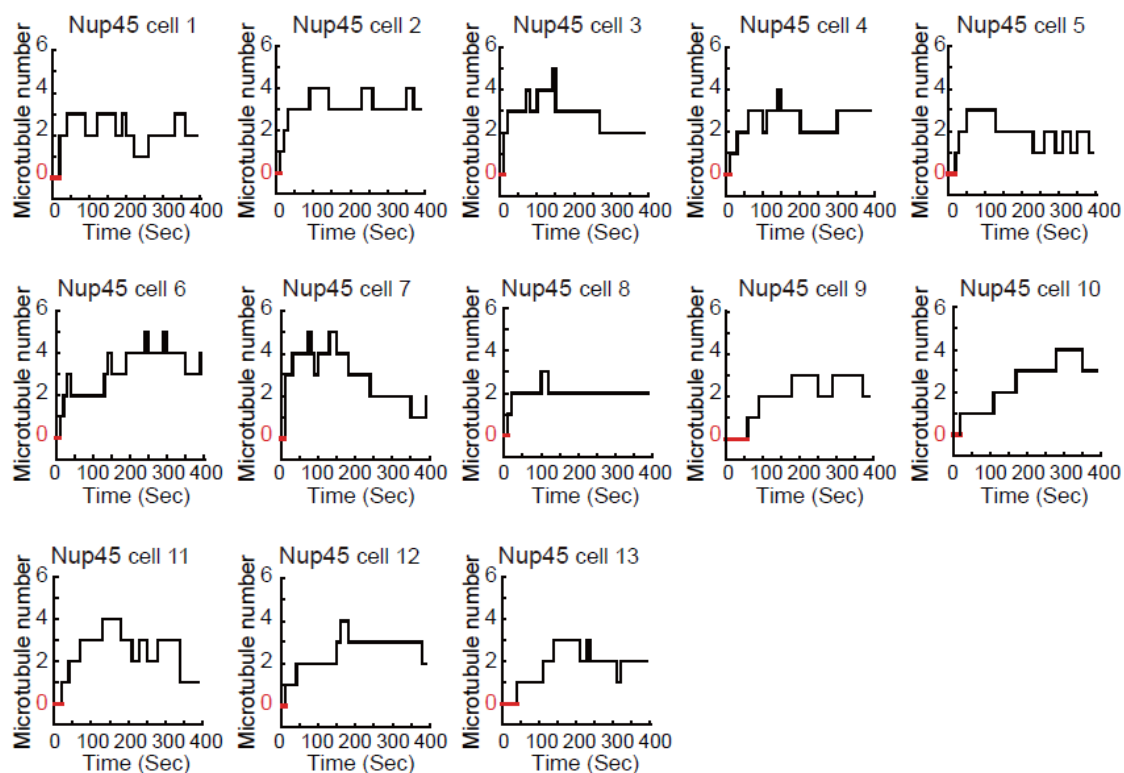

**Figure S5.** Step plots of microtubule number against time after MBC washout for *alp7Δ* Nup45-GBP-mCherry cells (related to Figure 5G).

### Supplementary Tables

**Table S1. Yeast strains**

| Strain          | Genotype                                                                             | Source     |
|-----------------|--------------------------------------------------------------------------------------|------------|
| <u>Figure 1</u> |                                                                                      |            |
| CF.4250         | <i>mto1-3GFP:KanR mCherry-atb2:HygR ade6-m210 leu1-32 ura4-D18 h-</i>                | Lab stock  |
| CF.4844         | <i>mto1-3GFP:KanR cut11-RFP:KanR mCherry-atb2:HygR ade6-m210 leu1-32 ura4-D18 h+</i> | This study |
| <u>Figure 2</u> |                                                                                      |            |
| CF.4250         | <i>mto1-3GFP:KanR mCherry-atb2:HygR ade6-m210 leu1-32 ura4-D18 h-</i>                | Lab stock  |
| CF.4844         | <i>mto1-3GFP:KanR cut11-RFP:KanR mCherry-atb2:HygR ade6-m210 leu1-32 ura4-D18 h+</i> | This study |
| CF.5150         | <i>alp7Δ: Ura4+ mto1-3GFP:KanR mCherry-atb2:HygR ade6-m210 leu1-</i>                 | This study |

|                 |                                                                                                                  |            |
|-----------------|------------------------------------------------------------------------------------------------------------------|------------|
| CF.4845         | 32 ura4-D18 h-<br>alp7Δ: Ura4+ mto1-3GFP:KanR cut11-RFP:KanR mCherry-atb2:HygR<br>ade6-m210 leu1-32 ura4-D18 h?  | This study |
| CF.6374         | alp14Δ:NatR mto1-3GFP:KanR mCherry-atb2:HygR ade6-m210 leu1-<br>32 ura4-D18 h-                                   | This study |
| CF.6376         | alp14Δ:NatR mto1-3GFP:KanR cut11-RFP:KanR mCherry-atb2:HygR<br>ade6-m210 leu1-32 ura4-D18 h+                     | This study |
| CF.5155         | mto1-13Myc:NatR alp7-3GFP:KanR ade6-m210 leu1-32 ura4-D18 h?                                                     | This study |
| CF.5991         | mto1-13Myc:NatR rga1-3GFP:KanR ade6-m210 leu1-32 ura4-D18 h?                                                     | This study |
| CF.5991         | mto1-13Myc:NatR rga1-3GFP:KanR ade6-m210 leu1-32 ura4-D18 h?                                                     | This study |
| CF.4849         | mto1-3GFP:KanR sid4-tdTomato:HygR ade6-m210 leu1-32 ura4-D18<br>h+                                               | This study |
| CF.4850         | alp7Δ:Ura4+ mto1-3GFP:KanR sid4-tdTomato:HygR ade6-m210 leu1-<br>32 ura4-D18 h?                                  | This study |
| CF.6380         | alp14Δ: NatR mto1-3GFP:KanR sid4-tdTomato:HygR ade6-m210<br>leu1-32 ura4-D18 h+                                  | This study |
| <u>Figure 3</u> |                                                                                                                  |            |
| CF.5150         | alp7Δ: Ura4+ mto1-3GFP:KanR mCherry-atb2:HygR ade6-m210 leu1-<br>32 ura4-D18 h-                                  | This study |
| CF.6374         | alp14Δ:NatR mto1-3GFP:KanR mCherry-atb2:HygR ade6-m210 leu1-<br>32 ura4-D18 h-                                   | This study |
| <u>Figure 4</u> |                                                                                                                  |            |
| CF.1246         | alp7-3GFP:KanR mCherry-atb2:HygR ade6-m210 leu1-32 ura4-D18 h-                                                   | Lab stock  |
| CF.6147         | alp14-GFP:KanR mCherry-atb2:HygR ade6-m210 leu1-32 ura4-D18 h-                                                   | This study |
| CF.6457         | alp14Δ:NatR alp7-3GFP:KanR mCherry-atb2:HygR ade6-m210 leu1-<br>32 ura4-D18 h-                                   | This study |
| CF.6461         | alp7Δ: Ura4+ alp14-GFP:KanR mCherry-atb2:HygR ade6-m210 leu1-<br>32 ura4-D18 h-                                  | This study |
| <u>Figure 5</u> |                                                                                                                  |            |
| CF.5150         | alp7Δ: Ura4+ mto1-3GFP:KanR mCherry-atb2:HygR ade6-m210 leu1-<br>32 ura4-D18 h-                                  | This study |
| CF.5799         | alp7Δ: Ura4+ mto1-3GFP:KanR mCherry-atb2:HygR Leu1-32:ase1P*<br>-nup45-GBP ade6-m210 leu1-32 ura4-D18 h+         | This study |
| CF.5801         | alp7Δ: Ura4+ mto1-3GFP:KanR mCherry-atb2:HygR Leu1-32:ase1P*<br>-nup45-GBP-mCherry ade6-m210 leu1-32 ura4-D18 h- | This study |
| <u>Figure 6</u> |                                                                                                                  |            |
| CF.4848         | mto1Δ: Ura4+ mCherry-atb2:HygR ade6-m210 leu1-32 ura4-D18 h+                                                     | This study |
| CF.4847         | mto1Δ: Ura4+ alp7-3GFP:KanR mCherry-atb2:HygR ade6-m210 leu1-<br>32 ura4-D18 h+                                  | This study |
| CF.6909         | mto1Δ: Ura4+ alp14-GFP:KanR mCherry-atb2:HygR ade6-m210 leu1-<br>32 ura4-D18 h+                                  | This study |
| CF.1246         | alp7-3GFP:KanR mCherry-atb2:HygR ade6-m210 leu1-32 ura4-D18 h-                                                   | Lab stock  |
| CF.6147         | alp14-GFP:KanR mCherry-atb2:HygR ade6-m210 leu1-32 ura4-D18 h-                                                   | This study |
| CF.6457         | alp14Δ:NatR alp7-3GFP:KanR mCherry-atb2:HygR ade6-m210 leu1-<br>32 ura4-D18 h-                                   | This study |
| CF.6461         | alp7Δ: Ura4+ alp14-GFP:KanR mCherry-atb2:HygR ade6-m210 leu1-<br>32 ura4-D18 h-                                  | This study |

---

|                  |                                                                                                              |            |
|------------------|--------------------------------------------------------------------------------------------------------------|------------|
| <u>Figure S1</u> |                                                                                                              |            |
| CF.4250          | mto1-3GFP:KanR mCherry-atb2:HygR ade6-m210 leu1-32 ura4-D18 h-                                               | Lab stock  |
| <u>Figure S2</u> |                                                                                                              |            |
| CF.5150          | alp7Δ: Ura4+ mto1-3GFP:KanR mCherry-atb2:HygR ade6-m210 leu1-32 ura4-D18 h-                                  | This study |
| <u>Figure S3</u> |                                                                                                              |            |
| CF.6374          | alp14Δ: NatR mto1-3GFP:KanR mCherry-atb2:HygR ade6-m210 leu1-32 ura4-D18 h-                                  | This study |
| <u>Figure S4</u> |                                                                                                              |            |
| CF.5150          | alp7Δ: Ura4+ mto1-3GFP:KanR mCherry-atb2:HygR ade6-m210 leu1-32 ura4-D18 h-                                  | This study |
| CF.5801          | alp7Δ: Ura4+ mto1-3GFP:KanR mCherry-atb2:HygR Leu1-32:ase1P*-nup45-GBP-mCherry ade6-m210 leu1-32 ura4-D18 h- | This study |
| CF.5995          | alp7Δ: Ura4+ mto1-3GFP:KanR Leu1-32:ase1P*-nup45-GBP-mCherry ade6-m210 leu1-32 ura4-D18 h?                   | This study |
| CF.5800          | Leu1-32:ase1P*-nup45-GBP-mCherry ade6-m210 leu1-32 ura4-D18 h-                                               | This study |
| <u>Figure S5</u> |                                                                                                              |            |
| CF.5799          | alp7Δ: Ura4+ mto1-3GFP:KanR mCherry-atb2:HygR Leu1-32:ase1P*-nup45-GBP ade6-m210 leu1-32 ura4-D18 h+         | This study |

---

**Table S2. Plasmids**

| Plasmid          | Genotype                                          | Source     |
|------------------|---------------------------------------------------|------------|
| <u>Figure 2</u>  |                                                   |            |
| pCF.2438         | pET-22b-MBP- <i>alp7</i>                          | This study |
| pCF.2439         | pET-22b-MBP                                       | Lab stock  |
| <u>Figure 5</u>  |                                                   |            |
| pCF.2806         | pJK148- <i>ase1P</i> *- <i>nup45</i> -GBP         | This study |
| pCF.2807         | pJK148- <i>ase1P</i> *- <i>nup45</i> -GBP-mCherry | This study |
| <u>Figure S4</u> |                                                   |            |
| pCF.2807         | pJK148- <i>ase1P</i> *- <i>nup45</i> -GBP-mCherry | This study |
| <u>Figure S5</u> |                                                   |            |
| pCF.2806         | pJK148- <i>ase1P</i> *- <i>nup45</i> -GBP         | This study |

---
